# Supplementary material
Source: publisher figshare collection journal article supplement (https://future-science-group.figshare.com/ndownloader/files/34385975)
Supplement: Supplementary file 1 [file 34385975]

**Supplementary Table 1: Mapping blood donor testing requirements across different European countries**

|  | | **AT 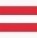** | **BE**  **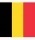** | **BG**  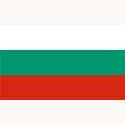 | **CY**  **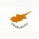** | **CZ**  **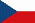** | **DE**  **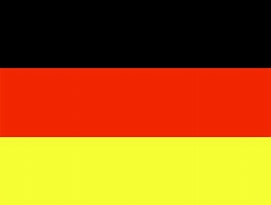** | **DK**  **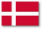** | **EE**  **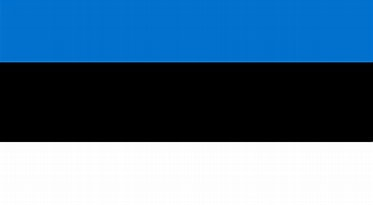** | **EL**  **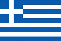** | **ES**  **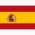** | **FI**  **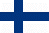** | **FR**  **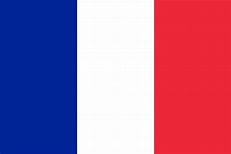** | **HR**  **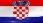** | **HU**  **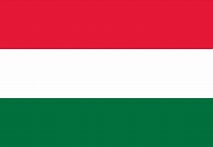** | **IE**  **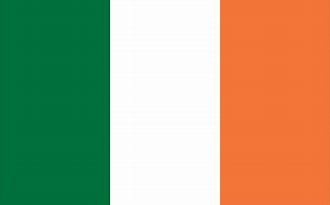** | **IT**  **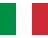** | **LT**  **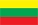** | **LU**  **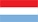** | **LV**  **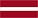** | **MT**  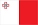 | **NL**  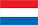 | **NO**  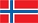 | **PL**  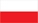 | **PT**  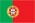 | **RO**  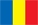 | **SE**  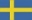 | **SI**  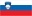 | **SK**  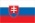 | **UK**  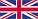 |
| --- | --- | --- | --- | --- | --- | --- | --- | --- | --- | --- | --- | --- | --- | --- | --- | --- | --- | --- | --- | --- | --- | --- | --- | --- | --- | --- | --- | --- | --- | --- |
| **Blood group testing** | **ABO typing** | **2004/33/EC Directive** | | | | | | | | | | | | | | | | | | | | | | | | | | | | |
| **RhD typing** | **2004/33/EC Directive** | | | | | | | | | | | | | | | | | | | | | | | | | | | | |
| **Other (Kell antigen system)** | * |  |  | * | ** | * | ** |  | * |  | ** | * |  |  | ** | * | * |  |  | ** | ** | ** |  |  |  |  | * | * |  |
| **Screening for irregular red cell antibodies/technique not specified** |  |  |  |  |  |  |  |  |  |  |  |  |  |  |  |  |  |  |  |  |  |  |  |  |  |  |  |  |  |
| **HLA testing** | |  |  |  |  |  |  |  |  |  |  | **  (HLA Ab, HLA gene) | **  (technique not specified, HLA Ab, HLA Ag, HLA gene) |  |  |  | **  (technique  not specified) |  |  |  |  | **  (technique not specified) |  |  |  |  |  |  |  |  |
| **HIV-1 and HIV-2** | **Anti-HIV1** | **2004/33/EC Directive** | | | | | | | | | | | | | | | | | | | | | | | | | | | | |
| **Anti-HIV2** | **2004/33/EC Directive** | | | | | | | | | | | | | | | | | | | | | | | | | | | | |
| **HIV 1p24** |  |  |  | * |  |  |  |  |  |  |  |  |  |  |  |  |  |  |  |  |  |  |  |  | ** |  |  |  |  |
| **HIV NAT pool or ID** | * |  |  |  | * | * |  |  |  |  |  |  |  |  |  |  |  |  |  |  |  |  |  |  |  |  |  |  |  |
| **HIV NAT ID** |  |  |  |  |  |  |  |  |  |  |  |  |  |  |  |  |  |  |  |  |  |  |  |  |  |  |  |  |  |
| **Other technique** |  |  |  |  |  |  |  |  | * |  |  |  |  |  |  |  |  |  |  |  |  |  |  |  |  |  |  |  |  |
| **Hepatitis B** | **HBsAg** |  |  |  |  |  |  |  |  |  |  |  |  |  |  |  |  |  |  |  |  |  |  |  |  |  |  |  |  |  |
| **Anti-HBc** |  | * |  | * |  | * | ** |  |  |  |  |  |  |  |  |  |  | ** |  |  |  |  |  |  | ** |  |  |  | ** |
| **Anti-HBs** |  |  |  | * |  |  |  |  |  |  |  | * |  |  |  |  |  |  |  |  | ** |  |  | * |  |  |  |  | ** |
| **HBV NAT pool or ID** |  | Blood services use for  all donations triplet  HIV /HBV/HCV NAT  tests. So HBV NAT is  included. |  |  | * | ** |  |  |  |  |  |  |  |  |  |  |  |  |  |  |  |  |  |  |  |  |  |  |  |
| **HBV NAT ID** |  |  |  |  |  |  |  |  |  |  |  |  |  |  |  |  |  |  |  |  |  |  |  |  |  |  |  |  |  |
| **Hepatitis C** | **Anti-HCV** | **2004/33/EC Directive** | | | | | | | | | | | | | | | | | | | | | | | | | | | | |
| **HCV NAT pool or ID** | * |  |  |  | * | * |  |  |  |  |  |  |  |  |  |  |  |  |  |  |  |  |  |  |  |  |  |  |  |
| **HCV NAT ID** |  |  |  |  |  |  |  |  |  |  |  |  |  |  |  |  |  |  |  |  |  |  |  |  |  |  |  |  |  |
| **Hepatitis E** | **Anti-HEV** |  |  |  |  |  |  |  |  |  |  |  |  |  |  |  |  |  |  |  |  |  |  |  |  |  |  |  |  |  |
| **HEV NAT pool or ID** |  |  |  |  |  |  |  |  |  |  |  | ** |  |  |  |  |  | ** |  |  |  |  |  |  |  |  |  |  | ** |
| **HEV NAT ID** |  |  |  |  |  |  |  |  |  |  |  | ** |  |  |  |  |  |  |  |  |  |  |  |  |  |  |  |  |  |
| **HTLV-1** | **Technique not specified** |  |  |  |  |  |  |  |  |  | ** |  |  |  |  |  |  |  |  |  |  |  |  |  |  |  |  |  |  |  |
| **Anti-HTLV-1** |  |  |  |  |  |  |  |  |  |  |  |  |  |  |  |  |  | ** |  |  | ** | ** |  | * |  | * |  |  | ** |
| **HTLV-1 NAT pool or ID** |  |  |  |  |  |  |  |  |  |  |  |  |  |  |  |  |  |  |  |  |  |  |  |  |  |  |  |  |  |
| **HTLV-1 NAT ID** |  |  |  |  |  |  |  |  |  |  |  |  |  |  |  |  |  |  |  |  |  |  |  |  |  |  |  |  |  |
| **Other technique** |  |  |  |  |  |  |  |  |  |  |  |  |  |  |  |  |  |  |  |  |  |  |  |  |  |  |  |  |  |
| **HTLV-2** | **Technique not specified** |  |  |  |  |  |  |  |  |  | ** |  |  |  |  |  |  |  |  |  |  |  |  |  |  |  |  |  |  |  |
| **Anti-HTLV-2** |  |  |  |  |  |  |  |  |  |  |  |  |  |  |  |  |  | ** |  |  | ** | ** |  | * |  | * |  |  |  |
| **HTLV-2 NAT pool or ID** |  |  |  |  |  |  |  |  |  |  |  |  |  |  |  |  |  |  |  |  |  |  |  |  |  |  |  |  |  |
| **HTLV-2 NAT ID** |  |  |  |  |  |  |  |  |  |  |  |  |  |  |  |  |  |  |  |  |  |  |  |  |  |  |  |  |  |
| **Other technique** |  |  |  |  |  |  |  |  |  |  |  |  |  |  |  |  |  |  |  |  |  |  |  |  |  |  |  |  |  |
| **Cytomegalovirus** | **Technique not specified** |  |  |  |  |  |  |  |  |  |  |  | ** |  |  |  |  |  |  |  |  |  |  |  |  |  |  |  |  |  |
| **Anti-CMV** |  |  |  | * |  |  |  |  | ** |  |  | * |  |  | ** | ** |  | ** |  | ** | ** |  |  |  |  |  | ** |  | ** |
| **CMV NAT pool or ID** |  |  |  |  |  |  |  |  |  |  |  |  |  |  |  |  |  |  |  |  |  |  |  |  |  |  |  |  |  |
| **CMV NAT ID** |  |  |  |  |  |  |  |  |  |  |  |  |  |  |  |  |  |  |  |  |  |  |  |  |  |  |  |  |  |
| **Other technique** |  |  |  |  |  |  |  |  | ** |  |  |  |  |  |  |  |  |  |  |  |  |  |  |  |  |  |  |  |  |
| **West Nile Virus** | **Technique not specified** |  |  |  |  |  |  |  |  |  | ** |  |  |  |  |  |  |  |  |  |  |  |  |  |  | ** | * |  |  |  |
| **WNV NAT pool or ID** |  |  |  |  | * |  |  |  |  |  |  | ** |  | * |  | * |  | ** |  |  |  |  |  |  | ** |  |  |  | ** |
| **WNV NAT ID** |  |  |  |  |  |  |  | * | * |  |  | ** |  |  | ** |  |  |  |  |  |  |  |  |  |  |  |  | * |  |
| **Other technique** |  |  |  |  |  |  |  |  | * |  |  |  |  |  |  |  |  |  |  |  |  |  |  |  |  |  |  |  |  |
| **Epstein-Barr Virus (EBV)** | **Technique not specified** |  |  |  |  |  |  |  |  |  |  |  |  |  |  |  |  |  |  |  |  |  |  |  |  |  |  |  |  |  |
| **Anti-EBV** |  |  |  |  |  |  |  |  |  |  |  |  |  |  |  |  |  |  |  |  |  |  |  |  |  |  |  |  |  |
| **EBV NAT pool or ID** |  |  |  |  |  |  |  |  |  |  |  |  |  |  |  |  |  |  |  |  |  |  |  |  |  |  |  |  |  |
| **EBV NAT ID** |  |  |  |  |  |  |  |  |  |  |  |  |  |  |  |  |  |  |  |  |  |  |  |  |  |  |  |  |  |
| **Other technique** |  |  |  |  |  |  |  |  |  |  |  |  |  |  |  |  |  |  |  |  |  |  |  |  |  |  |  |  |  |
| **Human Parvovirus B19** | **Technique not specified** |  |  |  |  |  |  |  |  |  |  |  |  |  |  |  |  |  |  |  |  | ** |  |  |  |  |  |  |  |  |
| **HPVB19 NAT pool or ID** |  |  |  |  | * |  |  |  |  |  |  | ** |  |  |  | * |  |  |  |  |  |  | * |  |  |  |  |  |  |
| **HPVB19 NAT ID** |  |  |  |  |  |  |  |  |  |  |  |  |  |  |  |  |  |  |  |  |  |  |  |  |  |  |  |  |  |
| **Other technique** |  |  |  |  |  |  |  |  |  |  |  |  |  |  |  |  |  |  |  |  |  |  |  |  |  |  |  |  |  |
| **Herpes Simplex Virus (HSV)** | **Technique not specified** |  |  |  |  |  |  |  |  |  |  |  |  |  |  |  |  |  |  |  |  |  |  |  |  |  |  |  |  |  |
| **HSV Ag** |  |  |  |  |  |  |  |  |  |  |  |  |  |  |  |  |  |  |  |  |  |  |  |  |  |  |  |  |  |
| **HSV Ab** |  |  |  |  |  |  |  |  |  |  |  |  |  |  |  |  |  |  |  |  |  |  |  |  |  |  |  |  |  |
| **HSV NAT pool or ID** |  |  |  |  |  |  |  |  |  |  |  |  |  |  |  |  |  |  |  |  |  |  |  |  |  |  |  |  |  |
| **HSV NAT ID** |  |  |  |  |  |  |  |  |  |  |  |  |  |  |  |  |  |  |  |  |  |  |  |  |  |  |  |  |  |
| **Other technique** |  |  |  |  |  |  |  |  |  |  |  |  |  |  |  |  |  |  |  |  |  |  |  |  |  |  |  |  |  |
| **Trypanosomiasis** | **Technique not specified** |  |  |  |  |  |  |  |  |  | ** |  | * |  |  |  |  |  |  |  |  |  |  |  |  |  |  |  |  |  |
| **Microscopy** |  |  |  |  |  |  |  |  |  |  |  |  |  |  |  |  |  |  |  |  |  |  |  |  |  |  |  |  |  |
| **Anti-*Trypanosoma cruzi*** |  | ** |  |  |  |  |  |  |  |  |  |  |  |  |  |  |  | ** |  |  |  |  |  | * |  |  |  |  | * |
| ***T. cruzi* NAT pool or ID** |  |  |  |  |  |  |  |  |  |  |  |  |  |  |  |  |  |  |  |  |  |  |  |  |  |  |  |  |  |
| ***T. cruzi* NAT ID** |  |  |  |  |  |  |  |  |  |  |  |  |  |  |  |  |  |  |  |  |  |  |  |  |  |  |  |  |  |
| **Other technique** |  |  |  |  |  |  |  |  |  |  |  |  |  |  |  |  |  |  |  |  |  |  |  |  |  |  |  |  |  |
| **Babesiosis** | **Technique not specified** |  |  |  |  |  |  |  |  |  |  |  |  |  |  |  |  |  |  |  |  |  |  |  |  |  |  |  |  |  |
| **Microscopy** |  |  |  |  |  |  |  |  |  |  |  |  |  |  |  |  |  |  |  |  |  |  |  |  |  |  |  |  |  |
| **Anti-*Babesia*** |  |  |  |  |  |  |  |  |  |  |  |  |  |  |  |  |  |  |  |  |  |  |  |  |  |  |  |  |  |
| ***Babesia* NAT pool or ID** |  |  |  |  |  |  |  |  |  |  |  |  |  |  |  |  |  |  |  |  |  |  |  |  |  |  |  |  |  |
| ***Babesia* NAT ID** |  |  |  |  |  |  |  |  |  |  |  |  |  |  |  |  |  |  |  |  |  |  |  |  |  |  |  |  |  |
| **Other technique** |  |  |  |  |  |  |  |  |  |  |  |  |  |  |  |  |  |  |  |  |  |  |  |  |  |  |  |  |  |
| **Leishmaniasis** | **Technique not specified** |  |  |  |  |  |  |  |  |  |  |  |  |  |  |  |  |  |  |  |  |  |  |  |  |  |  |  |  |  |
| **Microscopy** |  |  |  |  |  |  |  |  |  |  |  |  |  |  |  |  |  |  |  |  |  |  |  |  |  |  |  |  |  |
| **Anti-*Leishmania sp.*** |  |  |  |  |  |  |  |  |  |  |  |  |  |  |  |  |  |  |  |  |  |  |  |  |  |  |  |  |  |
| ***Leishmania sp.* NAT pool or ID** |  |  |  |  |  |  |  |  |  |  |  |  |  |  |  |  |  |  |  |  |  |  |  |  |  |  |  |  |  |
| ***Leishmania sp.* NAT ID** |  |  |  |  |  |  |  |  |  |  |  |  |  |  |  |  |  |  |  |  |  |  |  |  |  |  |  |  |  |
| **Other technique** |  |  |  |  |  |  |  |  |  |  |  |  |  |  |  |  |  |  |  |  |  |  |  |  |  |  |  |  |  |
| **Toxoplasmosis** | **Technique not specified** |  |  |  |  |  |  |  |  |  |  |  |  |  |  |  |  |  |  |  |  |  |  |  |  |  |  |  |  |  |
| **Microscopy** |  |  |  |  |  |  |  |  |  |  |  |  |  |  |  |  |  |  |  |  |  |  |  |  |  |  |  |  |  |
| **Anti-*Toxoplasma gondii*** |  |  |  |  |  |  |  |  |  |  |  |  |  |  |  |  |  |  |  |  |  |  |  |  |  |  |  |  |  |
| ***T. gondii* NAT pool or ID** |  |  |  |  |  |  |  |  |  |  |  |  |  |  |  |  |  |  |  |  |  |  |  |  |  |  |  |  |  |
| ***T. gondii* NAT ID** |  |  |  |  |  |  |  |  |  |  |  |  |  |  |  |  |  |  |  |  |  |  |  |  |  |  |  |  |  |
| **Other technique** |  |  |  |  |  |  |  |  |  |  |  |  |  |  |  |  |  |  |  |  |  |  |  |  |  |  |  |  |  |
| **Treponema pallidum (Syphillis)** | **Technique not specified** | * |  |  |  |  |  |  |  |  |  |  |  |  |  |  |  |  |  |  |  |  |  |  |  |  |  |  |  |  |
|  | **Microscopy** |  |  |  |  |  |  |  |  |  |  |  |  |  |  |  |  |  |  |  |  |  |  |  |  |  |  |  |  |  |
|  | **Anti-*T. pallidum*** | * |  |  | * |  | * |  |  |  |  |  |  |  |  |  |  | * |  |  |  |  | ** |  |  |  |  | * |  |  |
|  | ***T. pallidum* NAT pool or ID** |  |  |  |  |  |  |  |  |  |  |  |  |  |  |  |  |  |  |  |  |  |  |  |  |  |  |  |  |  |
|  | ***T. pallidum* NAT ID** |  |  |  |  |  |  |  |  |  |  |  |  |  |  |  |  |  |  |  |  |  |  |  |  |  |  |  |  |  |
|  | **Culture** |  |  |  |  |  |  |  |  |  |  |  |  |  |  |  |  |  |  |  |  |  |  |  |  |  |  |  |  |  |
|  | **Other technique** |  |  |  |  |  |  |  |  |  |  |  |  |  |  |  |  |  |  |  |  |  |  |  |  |  |  |  |  |  |

|  | Minimum testing requirements as per the 2004/33/EC Directive |
| --- | --- |
|  | More stringent testing as per national requirements – Legally binding  (* Testing performed under specific conditions) |
|  | More stringent testing as per national requirements – Recommended  (** Testing performed under specific conditions) |
|  | Not legally binding and not recommended at national level |

AT = Austria, BE = Belgium, BG = Bulgaria, CY = Cyprus, CZ = Czech Republic, DE = Germany, DK = Denmark, EE = Estonia, EL = Greece, ES = Spain, FI = Finland, FR = France, HR = Croatia, HU = Hungary, IE = Ireland, IT = Italy, LT = Lithuania, LU = Luxembourg, LV = Latvia, MT = Malta, NL = Netherlands, NO = Norway, PL = Poland, PT = Portugal, RO = Romania, Sweden = SE, SI = Slovenia, SK = Slovakia, UK = United Kingdom.

RhD = rhesus D, HLA = human leukocyte antigens, Ab = antibody, HIV-1 = human immunodeficiency virus type 1, HIV-2 = human immunodeficiency virus type 2, NAT = nucleic acid testing, ID = individual specimens, HBsAg = surface antigen of the hepatitis B virus, Anti-HBc = hepatitis B core antibody, Anti-HBs = Hepatitis B surface antibody, HBV = hepatitis B virus, HCV = hepatitis C virus, HEV = hepatitis E virus, HTLV-1 = human T-cell lymphotropic virus type 1, HTLV-2 = human T-cell lymphotropic virus type 2, CMV = cytomegalovirus, WNV = West Nile virus, EBV = Epstein-Barr virus, HPVB19 = human parvovirus B19, HSV = herpes simplex virus.
